# Supplementary material for: Co-functionalized organic/inorganic hybrid ZnO nanorods as electron transporting layers for inverted organic solar cells
Source: Royal Society of Chemistry journal article supplement (doi:10.1039/c5nr08849f), 2016-01-01
Supplement: c5nr08849f1.pdf [file c5nr08849f1.pdf]

## Supporting Information

### **Co-Functionalized Organic/Inorganic Hybrid ZnO Nanorods as Electron Transporting Layers for Inverted Organic Solar Cells**

Swapnil B. Ambade,<sup>a</sup> Rohan B. Ambade,<sup>a</sup> Seung Hun Eom,<sup>a</sup> Myoung Jin Baek,<sup>b</sup> Sushil S. Bagde,<sup>a</sup> Rajaram S. Mane,<sup>c</sup> and Soo-Hyoung Lee<sup>\*, a</sup>

<sup>a</sup> School of Semiconductor and Chemical Engineering, Chonbuk National University, 664-14, 1-ga Deokjin-dong, Deokjin-gu, Jeonju, Jeonbuk, 561-756, Republic of Korea.

<sup>b</sup> Department of Chemistry, Ulsan National Institute of Science and Technology (UNIST), Ulsan, 689-798, Republic of Korea.

<sup>c</sup> Centre for Nanomaterials & Energy Devices, School of Physical Sciences, SRTM, University, 431606, Nanded, India.

\*Corresponding author, E-mail: [shlee66@jbnu.ac.kr](mailto:shlee66@jbnu.ac.kr), Tel: +82 63 270 2435 Fax: +82 63 270 2306.

**Estimation of structural parameters:** The structural parameters of each ETL were estimated from XRD using Debye Scherrer formula.

$$D = \lambda k / \beta \cos \theta \quad (1)$$

where k is a constant and  $\lambda$ ,  $\beta$ , and  $\theta$  are the XRD wavelength ( $\lambda = 1.5406 \text{ \AA}$ ), full width at half maximum (FWHM) and Bragg angle respectively. The crystal structure and lattice strain calculated from equation 1 are presented in Table S1.

**Table S1.** The structural parameters calculated from the XRD data.

| ETL                   | Orientation | FWHM [2 $\theta$ °] | d-spacing [Å] | Crystallite size (nm) | Lattice Strain |
|-----------------------|-------------|---------------------|---------------|-----------------------|----------------|
| <b>ZnO NRs</b>        | (100)       | 0.097416            | 2.81460       | 95.00                 | 0.0015         |
|                       | (002)       | 0.162360            | 2.53955       | 60.15                 | 0.0022         |
|                       | (101)       | 0.129888            | 2.39503       | 73.99                 | 0.0017         |
| <b>MEA-ZnO NRs</b>    | (100)       | 0.194832            | 2.93873       | 50.65                 | 0.0031         |
|                       | (002)       | 0.389664            | 2.60236       | 28.80                 | 0.0055         |
|                       | (101)       | 0.389664            | 2.47258       | 28.92                 | 0.0052         |
| <b>SM-ZnO NRs</b>     | (100)       | 0.5196              | 2.81538       | 22.91                 | 0.0080         |
|                       | (002)       | 0.2273              | 2.53940       | 44.83                 | 0.0031         |
|                       | (101)       | 0.3897              | 2.39787       | 28.99                 | 0.0050         |
| <b>SM-MEA-ZnO NRs</b> | (100)       | 0.7144              | 2.80831       | 18.58                 | 0.0109         |
|                       | (002)       | 0.1948              | 2.53997       | 51.22                 | 0.0027         |
|                       | (101)       | 0.2598              | 2.39710       | 40.24                 | 0.0033         |

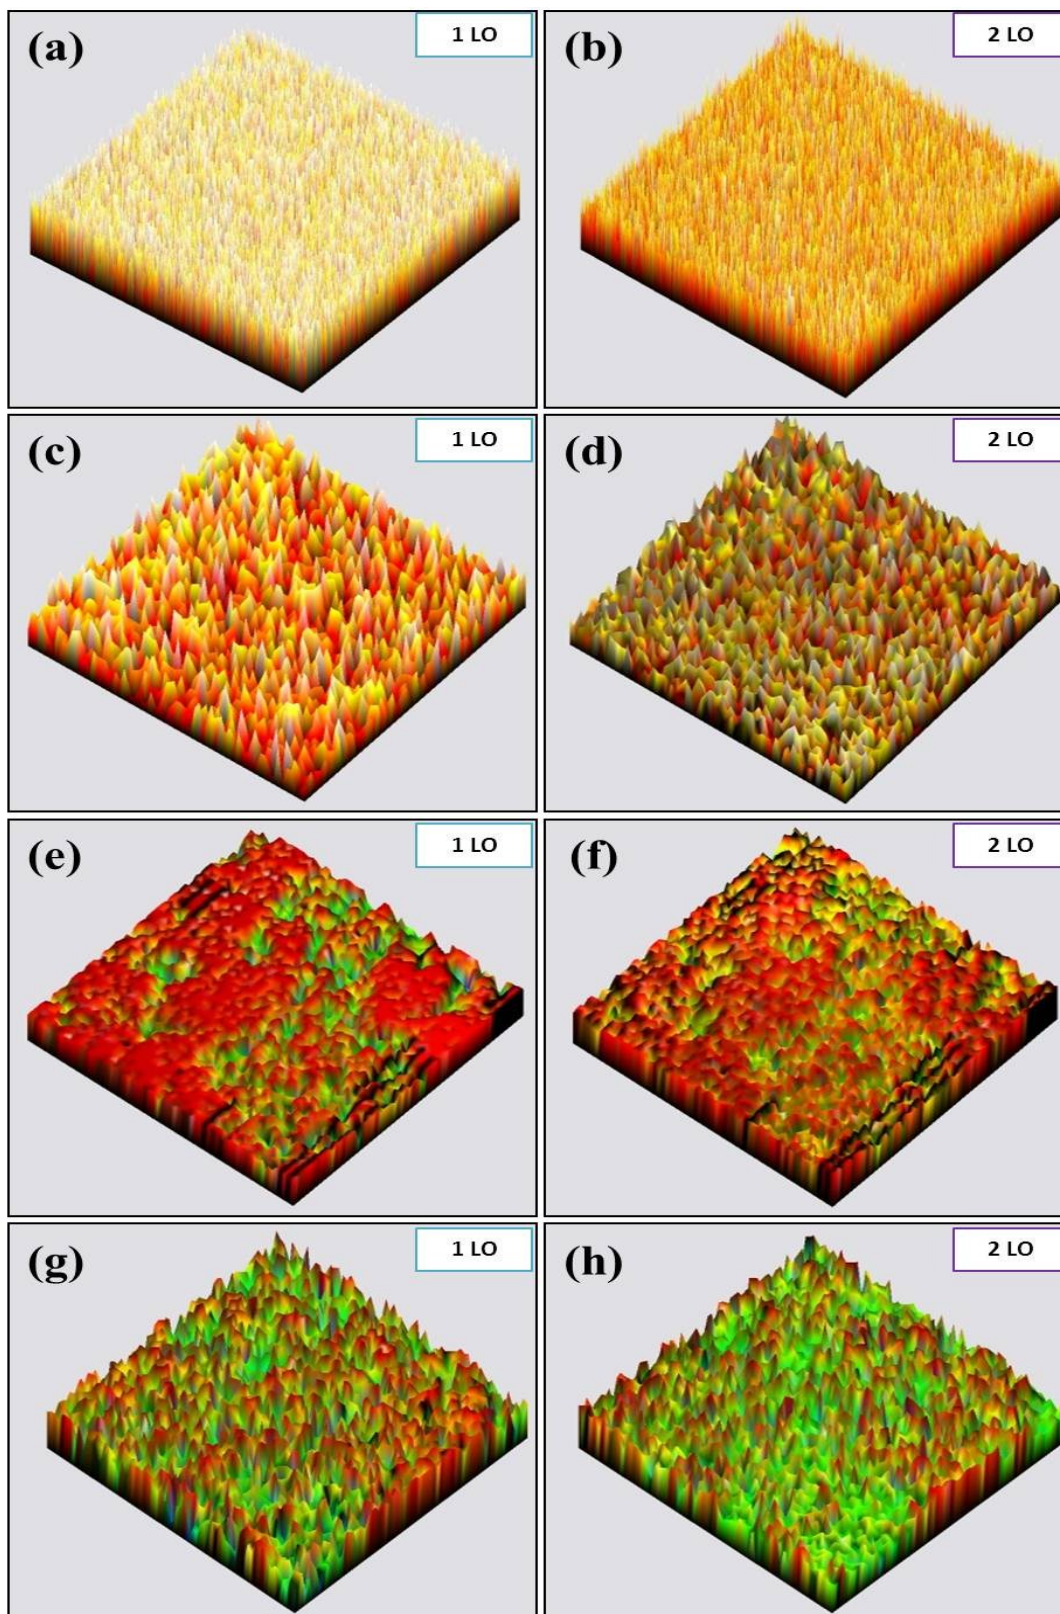

**Figure S1.** Raman mapping of ETLs (a-b) ZnO NRs, (c-d) MEA-ZnO NRs, (e-f) SM-ZnO NRs and (g-h) SM-MEA-ZnO NRs.

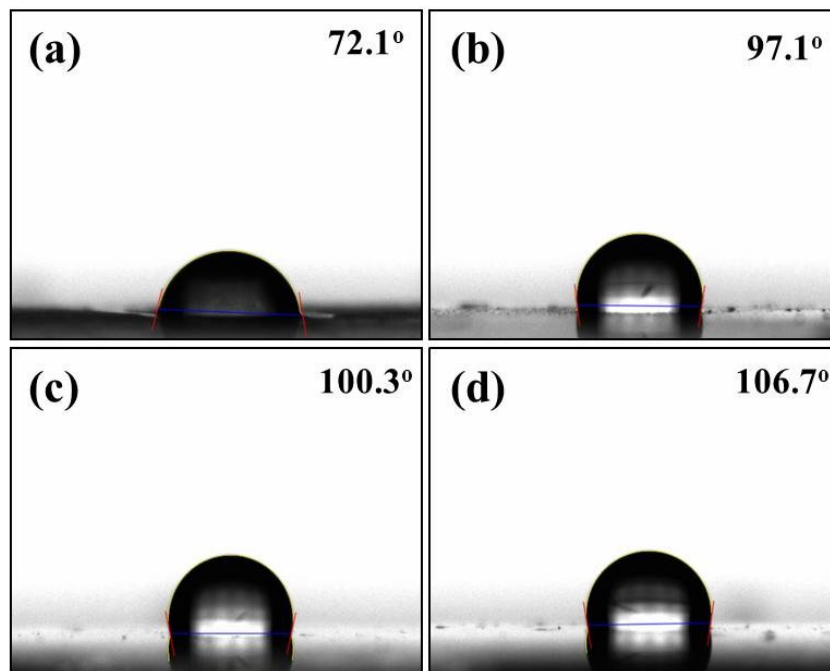

**Figure S2.** Water contact angle measurements after P3HT:PCBM photoactive coating on (a) ZnO NRs, (b) SM-ZnO NRs, (c) MEA-ZnO NRs and (d) SM-MEA-ZnO NRs.

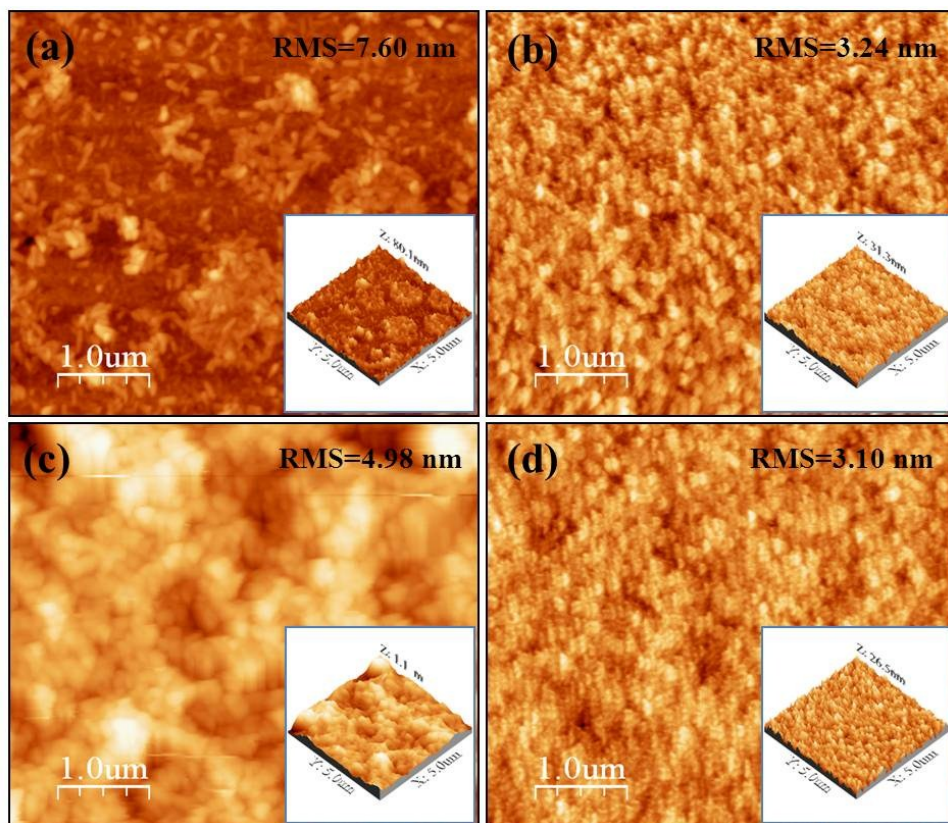

**Figure S3.** AFM topography of ETLs (a) ZnO NRs, (b) MEA-ZnO NRs, (c) SM-ZnO NRs and (d) SM-MEA-ZnO NRs.
